# Supplementary material for: A facile way to fabricate double-shell pomegranate-like porous carbon microspheres for high-performance Li-ion batteries
Source: Royal Society of Chemistry journal article supplement (doi:10.1039/c7ta02415k), 2017-01-01
Supplement: c7ta02415k1.pdf [file c7ta02415k1.pdf]

## Supporting information

### **A Facile Way to Synthesize Pomegranate-Like Porous Carbon Microspheres as an Improved Anode Material for Li-ion Batteries**

Lei Zhang,<sup>a</sup> Yuhai Dou,<sup>a</sup> Haipeng Guo,<sup>a</sup> Binwei Zhang,<sup>a</sup> Xiaoxiao liu,<sup>b</sup> Min Wan,<sup>b</sup> Weijie Li,<sup>a</sup>

Xianluo Hu,<sup>b</sup> Shixue Dou,<sup>a</sup> Yunhui Huang,<sup>b</sup> Huakun Liu<sup>a\*</sup>

*<sup>a</sup> Institute for Superconducting and Electronic Materials, University of Wollongong,  
Wollongong, NSW 2522, Australia,*

*<sup>b</sup> State Key Laboratory of Materials Processing and Die & Mould Technology,  
School of Materials Science and Engineering,*

*Huazhong University of Science and Technology, Wuhan 430074, P. R. China.*

\*To whom correspondence should be addressed. E-mail address: [hua@uow.edu.au](mailto:hua@uow.edu.au) (H. Liu),

Tel.: +61-2-4221-4547, Fax: +61-2-4221-5731.

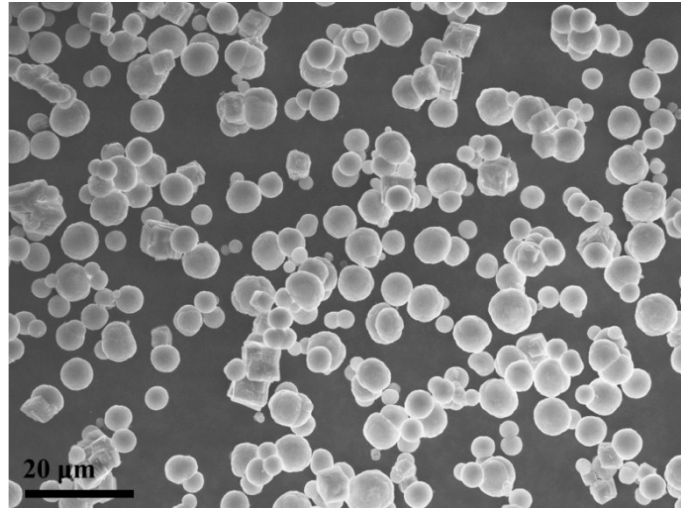

**Figure S1.** SEM image of C@CaCO<sub>3</sub>.

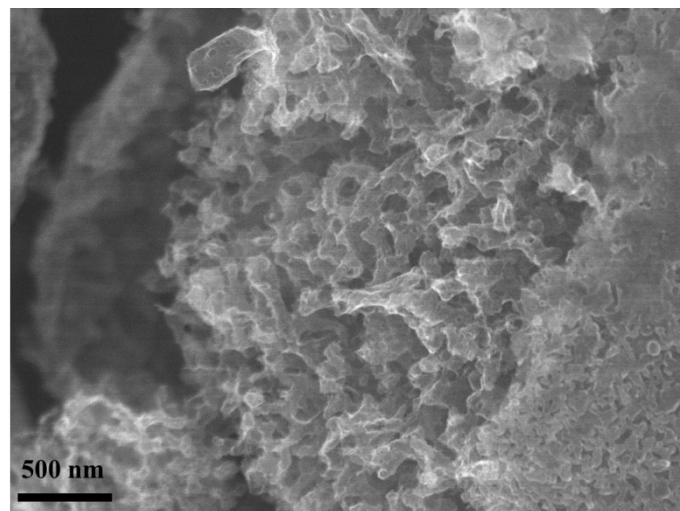

**Figure S2.** SEM image of the inside part of PCMs.

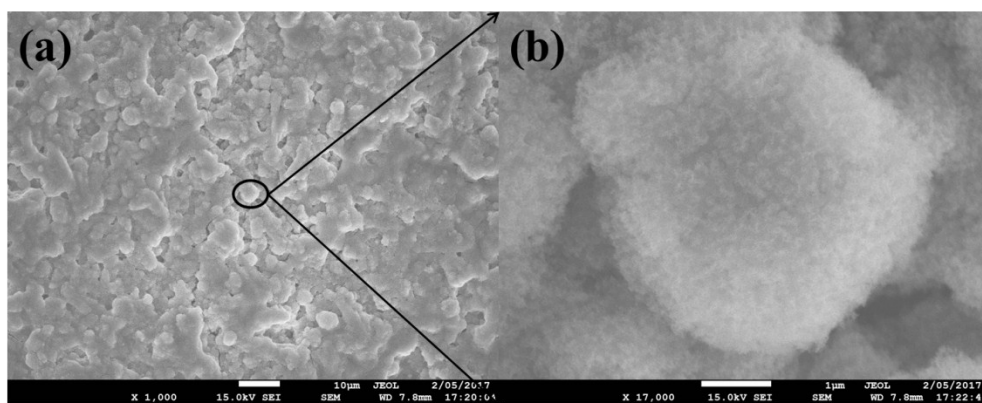

**Figure S3.** The SEM images of PCMs in different magnifications after cycling test.

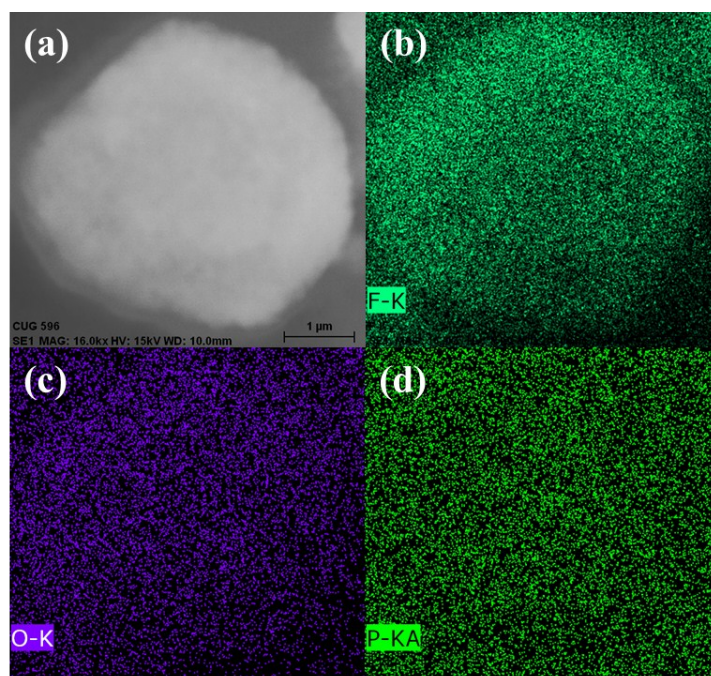

**Figure S4.** SEM image of PCMs after first cycling test (a), and elemental mapping for elements F (b), O (c) and P (d).

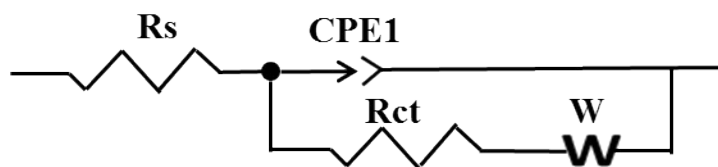

**Figure S5.** Equivalent circuit obtained from the EIS curve of PCMs.

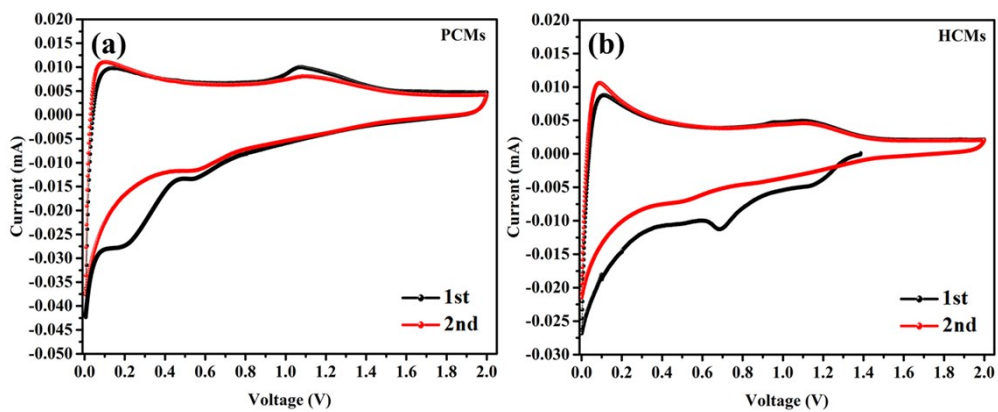

**Figure S6** The cyclic voltammety curves of PCMs (a) and HCMs (b).

**Table S1.** Charge resistance and solution resistance of PCMs and HCMs obtained from Nyquist Plots.

| Samples          | PCMs | HCMs |
|------------------|------|------|
| Rct ( $\Omega$ ) | 230  | 410  |
| Rs ( $\Omega$ )  | 4.5  | 5.7  |
